# Supplementary material for: Hydroxyethyl Starch-Based Functionalization of Gold Nanorods: A Possible Alternative to Polyethylene Glycol as a Surface Modifier
Source: Hindawi journal article supplement (doi:10.1155/2021/5555448), 2021-03-23
Supplement: f1 [file 5555448.f1.docx]

**Supplementary Figures**

**Figure S1: Synthetic route of PDA-HCl. The product was purified by re-dissolving in 20 mL of methanol for 5 times followed by air-drying for approximately 2 h.**


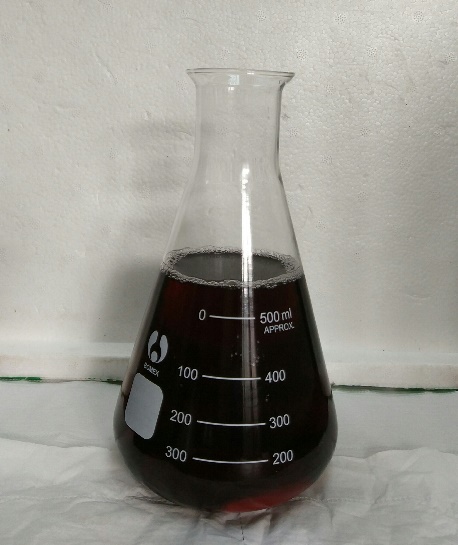


**Figure S2: Optical image of 500 mL AuNRs-CTAB solution (~808 nm) in Erlenmeyer flask.**


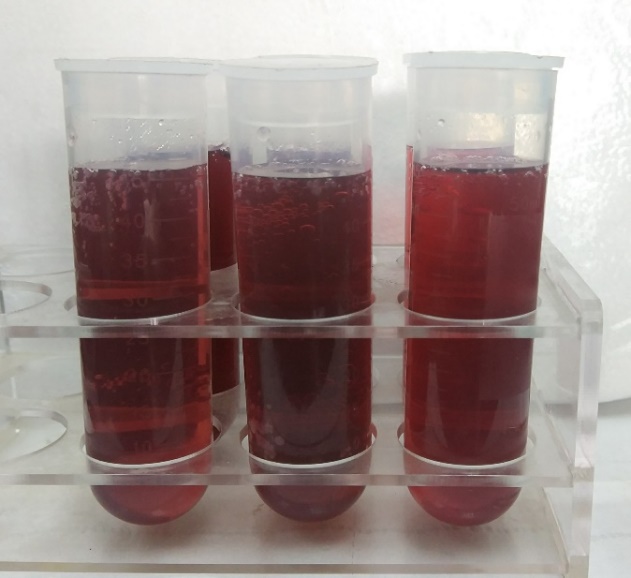


**Figure S3: AuNRs-CTAB solution subjected to centrifugation.**
